# Supplementary material
Source: PubMed Central journal article supplement (PMC7329227)
Supplement: NIHMS1593927-supplement-1.pdf [file NIHMS1593927-supplement-1.pdf]

## Supplemental Information

### **Co-immunization of DNA and Protein in the Same Anatomical Sites Induces Superior Protective Immune Responses against SHIV Challenge**

**Barbara K. Felber, Zhongyan Lu, Xintao Hu, Antonio Valentin, Margherita Rosati, Christopher A.L. Rimmel, Joshua A. Weiner, Margaret C. Carpenter, Katelyn Faircloth, Sherry Stanfield-Oakley, Wilton B. Williams, Xiaoying Shen, Georgia D. Tomaras, Celia C. LaBranche, David Montefiori, Hung V. Trinh, Mangala Rao, Munir S. Alam, Nathan A. Vandergrift, Kevin O. Saunders, Yunfei Wang, Wes Rountree, Jishnu Das, Galit Alter, Steven G. Reed, Pyone P. Aye, Faith Schiro, Bapi Pahar, Jason P. Dufour, Ronald S. Veazey, Preston A. Marx, David J. Venzon, George M. Shaw, Guido Ferrari, Margaret E. Ackerman, Barton F. Haynes, and George N. Pavlakis**

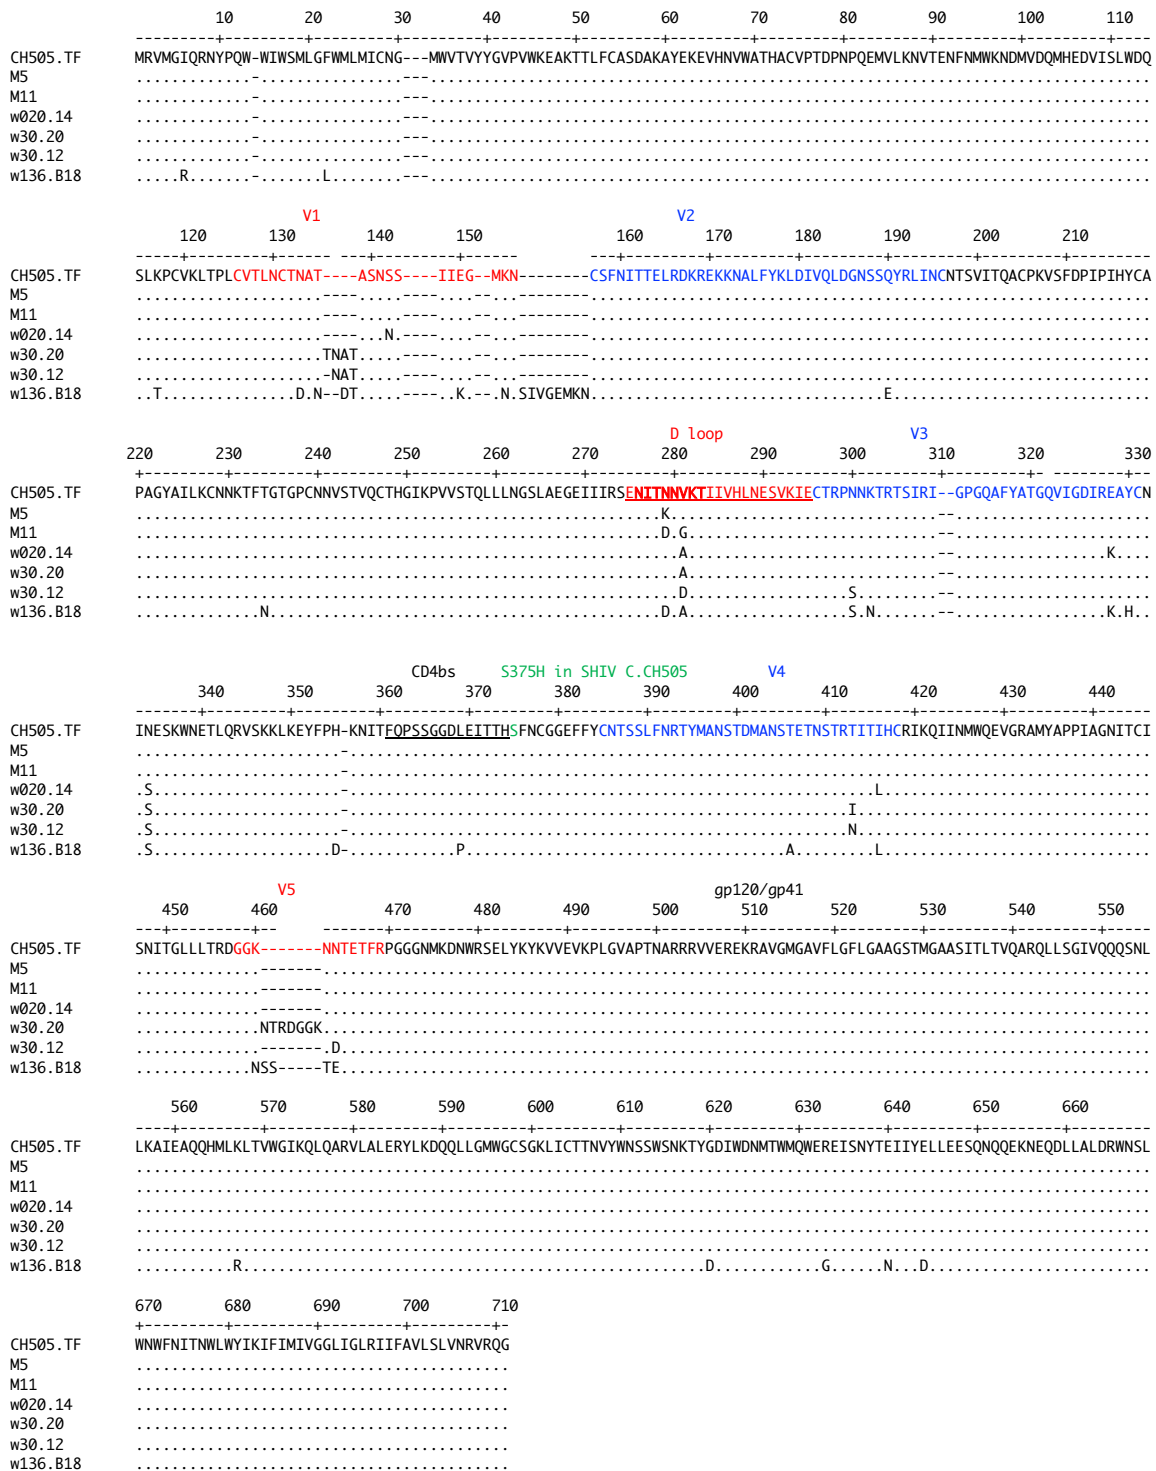

**Figure S1, Related to Figure 1: Alignment of CH505 Env Variants.**

Alignment of the CH505.TF gp145 and the sequentially isolated CH505 gp145 proteins used as immunogens in this study. The key differences among the immunogens in V1, loop D and V5 (indicated in red lettering) were associated with development of CD4bs NAb (Bonsignori et al., 2016; Liao et al., 2013). Based on inferred unmutated common ancestor (UCA) analysis, a CH505 Env that differs from the TF Env by a single amino acid N279K change in the D loop suggested that this variant (called M5) initiated the CH235 lineage, whereas two amino acid changes in the D loop (N279D and V281G) suggested that this variant (called M11) initiated the CH103 lineage (Bonsignori et al., 2016; Fera et al., 2014; Liao et al., 2013). Co-evolution of two the CH103 and CH235B cell lineages has been associated with the development and maturation of the CD4 binding site (CD4bs) in patient CH505 (Bonsignori et al., 2017; Bonsignori et al., 2016; Gao et al., 2014; LaBranche et al., 2019; Saunders et al., 2017). The amino acid (AA) numbering is according to HXB2. The amino acid S375H (indicated in green) indicates change in SHIV.CH505 Env.

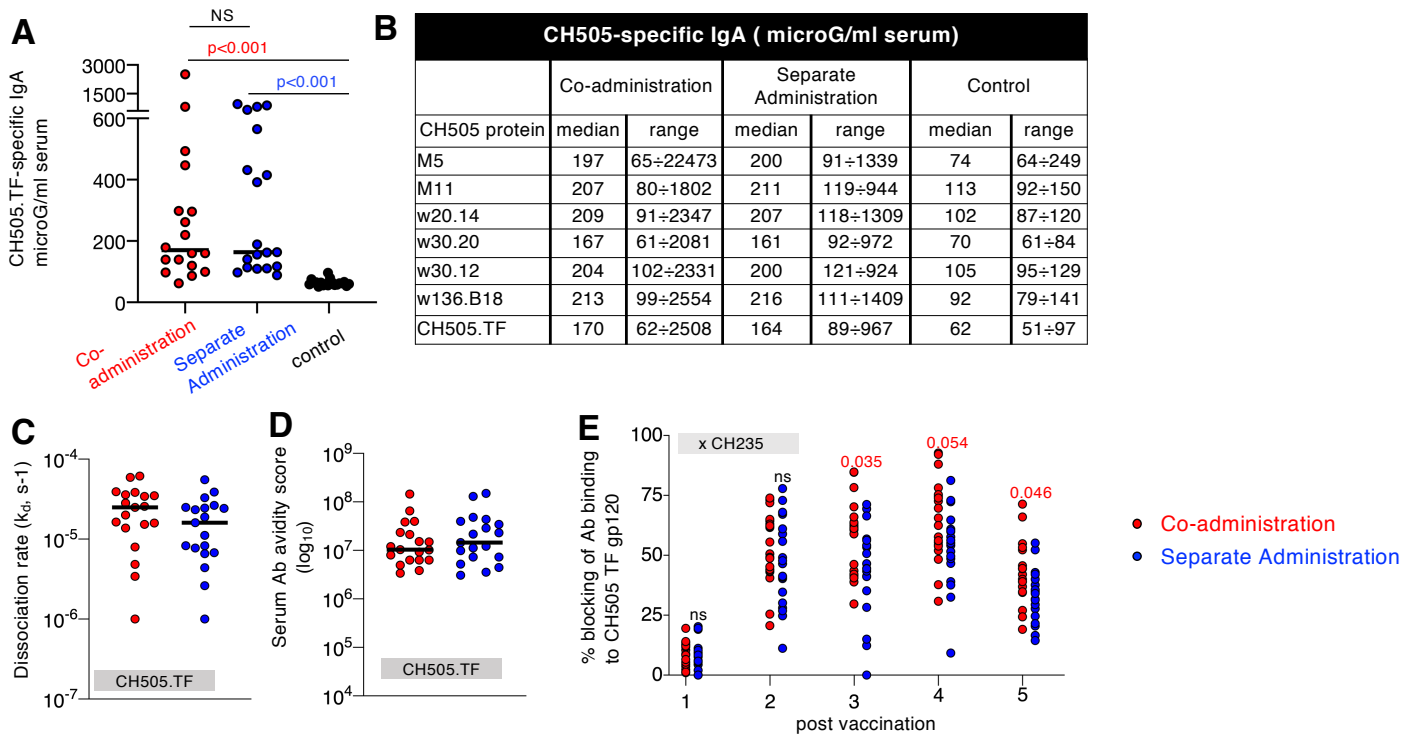

**Figure S2, Related to Figure 2: Characterization of CH505 Env Vaccine-induced Ab**

(A, B) CH505 Env-specific IgA in serum. IgA antibodies recognizing different Env proteins were measured in serum (1:250 fold dilution) and plotted as antigen-specific IgA (microG per ml), using a multiplex assay as described (Brown et al., 2017; Brown et al., 2015). Samples analyzed include Co-administration vaccine group (N=18); Separate Administration vaccine group (N=19); and controls (N=20). There was a significant difference comparing pre samples to 2 weeks post 6<sup>th</sup> vaccination for all RMs except the control group. (A) The panel shows the comparison of the CH505.TF-specific IgA measured in both vaccine groups and the controls. (B) Summary of the analysis of the median and range of CH505-specific IgA. (C, D) Avidity of vaccine-induced serum CH505-Env specific IgG. The binding magnitude (in response units [RU]) and dissociation rate constant ( $K_d$ ) (C) were measured and the avidity score (D) was calculated by determining the  $RU/K_d$  value with a slower dissociation rate resulting in higher avidity score. (E) CH505 vaccine-induced Env-specific antibodies recognize CD4 binding site on gp120 using CD4bs competition assays. Plasma Ab recognized the CD4bs in CH505 TF gp120 Env and this interaction was blocked by CD4bs-specific monoclonal antibodies (CH106, CH235) or soluble CD4 (sCD4). The assay showing CH235 competition performed over the course of the vaccination period is shown. The % inhibition is plotted. p values (Mann Whitney test) are given (color of p value indicates vaccine group with higher values).

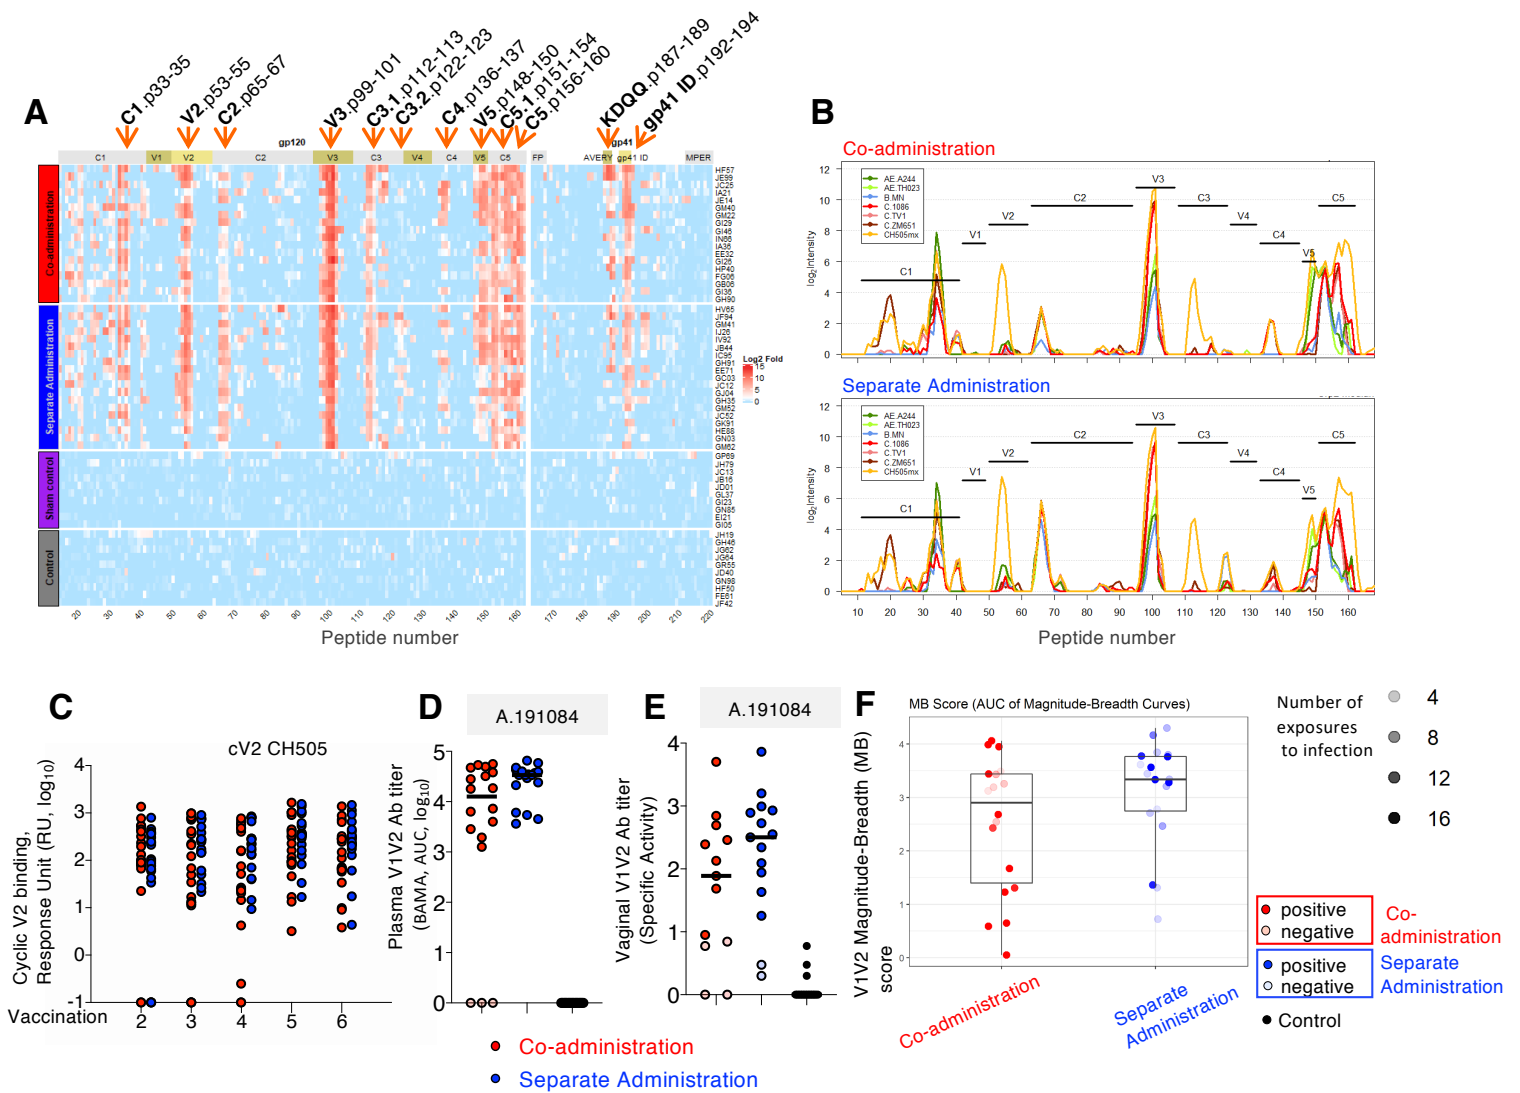

**Figure S3, Related to Figure 2. Env Ab Responses to Linear Peptide, Cyclic V2 and V1V2 Scaffold.**

(A, B) Plasma samples collected at 2 weeks post the 5<sup>th</sup> vaccination were tested for their ability to recognize overlapping linear peptides from CH505 TF gp145. (A) The binding to individual peptides is shown as heatmap. Responses targeting mainly V3, typical for HIV Env responses in macaques, in accord with our previous report (Shen et al., 2015), with a strong recognition of the V3 peptides (peptides 96-99 containing the V3 tip GPG AA 312-314). Most of the animals showed binding to the V2 region (peptides 53-55), containing the  $\alpha 4\beta 7$  integrin binding site (LDI/V AA179-181). Linear peptide mapping of plasma Ab showed overall comparable binding specificities to CH505 peptides in both vaccine groups, except higher binding to the C2 and C3.2 regions in the animals from the Separate Administration group. (B) The binding to peptides of different virus strains shows cross-clade responses including to peptides from different clades and CH505mx (max of all CH505 strains) with unique recognition of CH505 V2 and C3 regions. Values plotted are group medians. Each line represents a different sequence. The array data were processed using pepStat (Imholte and Gottardo, 2016). Binding magnitude: Log<sub>2</sub>-transformed, baseline (pre-bleed binding) subtracted signal intensity. (C) Env-specific Ab recognize CH505 V2 in plasma. Starting with samples collected after the 2<sup>nd</sup> vaccination, the vaccine-induced Ab recognized cyclic V2 peptide (cV2) from different clades (CH505, C.1086 and AE.92TH23) measured overtime by SPR using a 1:50 dilution of the plasma. The example of CH505 is shown. Low binding to cV2 MN was found (data not shown). (D-F) Antibody to a panel scaffolded gp70-V1V2 Env proteins (strains A, AE, B, C) were measured in (D) plasma and (E) vaginal secretion and the example of A.191084 is shown. Values from plasma are given as AUC (log<sub>10</sub>), values from mucosal samples are given as SA (Specific Activity). Mann-Whitney tests showed no significant differences between the groups. (F) Magnitude-Breadth (MB) scores for individual animals (He and Fong, 2019), of the two groups are shown (AUC of MB curves). The number of exposures to infection is indicated by transparency of the red or blue coloring.

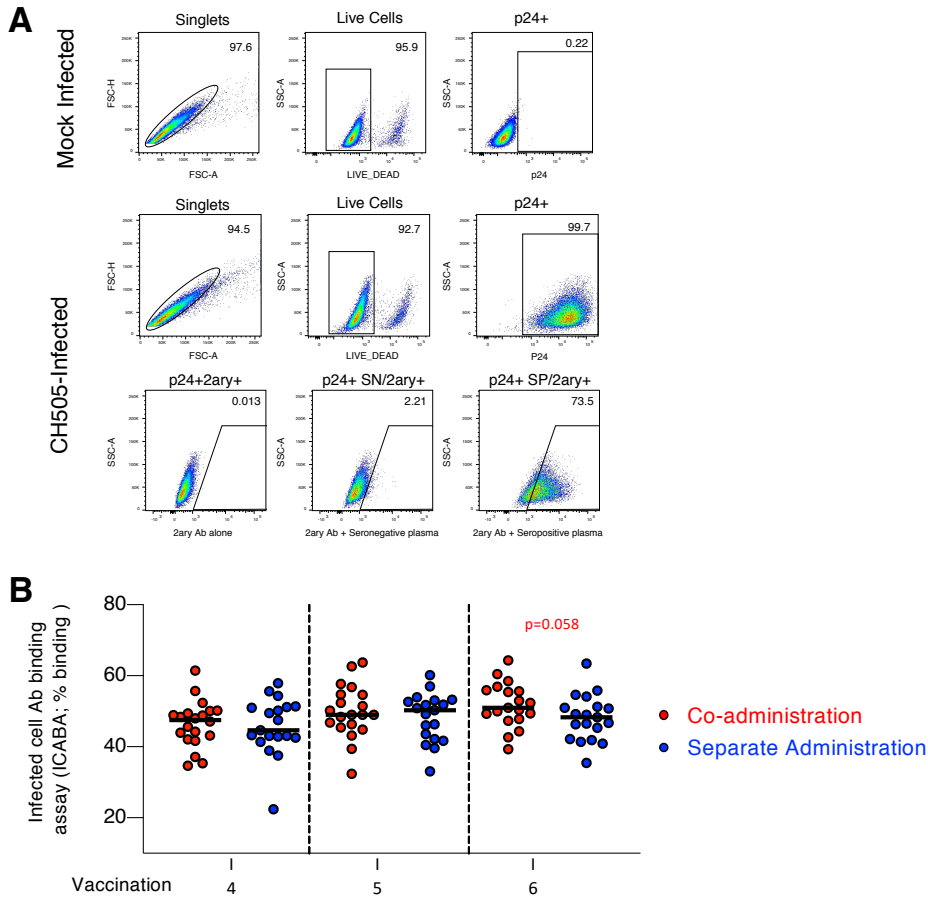

**Figure S4, Related to Figure 3: Infected Cell Antibody Binding Assay (ICABA) Detects Binding of the Vaccine-induced Env-specific Antibodies to the Surface of HIV.CH505 Infected Cells.**

(A) The dot plots of the top and middle rows illustrate the gating strategy to identify the singlets, live and infected p24Gag<sup>+</sup> cells (left to right) among the mock and CH505-infected cells, respectively. The bottom row illustrates the percentage of infected p24Gag<sup>+</sup> cells detected in presence of the secondary (2ary) Ab alone (left panel) or in presence of the seronegative (center) and seropositive (right) plasma. (B) Binding of anti-Env Ab exposed on the surface of HIV.CH505 infected cells was measured by ICABA showing % binding in the samples from the two vaccine groups. Data from the same analysis are shown as MFI in Figure 3D.

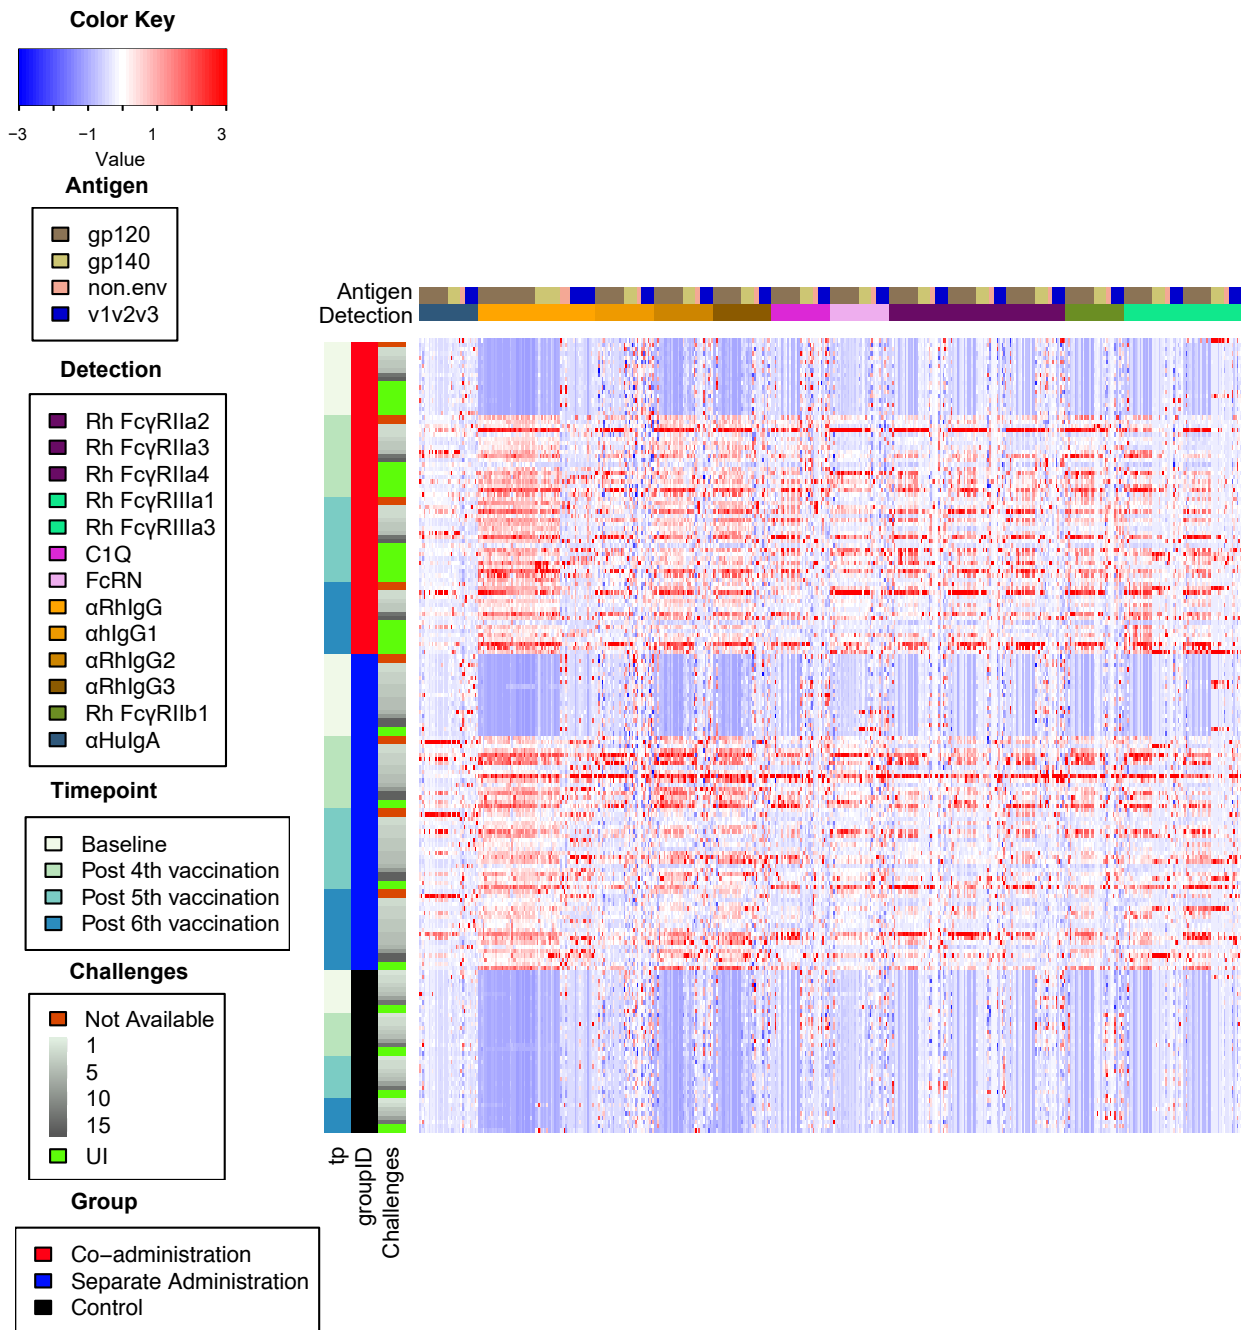

**Figure S5, Related to Figures 4-6: Heatmap of Fc Array Humoral Response Features.**

Animals (rows) are ordered by group, then timepoint, and finally in ascending order of time-to-infection. Each antibody response feature (columns) is comprised of an Fv (antigen) specificity and Fc (detection) reagent, such as rhesus (Rh) Fc receptors, and are sorted first by detection reagent, then by antigen. Antibody features are centered, scaled and truncated at  $\pm 3$  standard deviations from the column mean, with high responses indicated in red and low responses in blue.

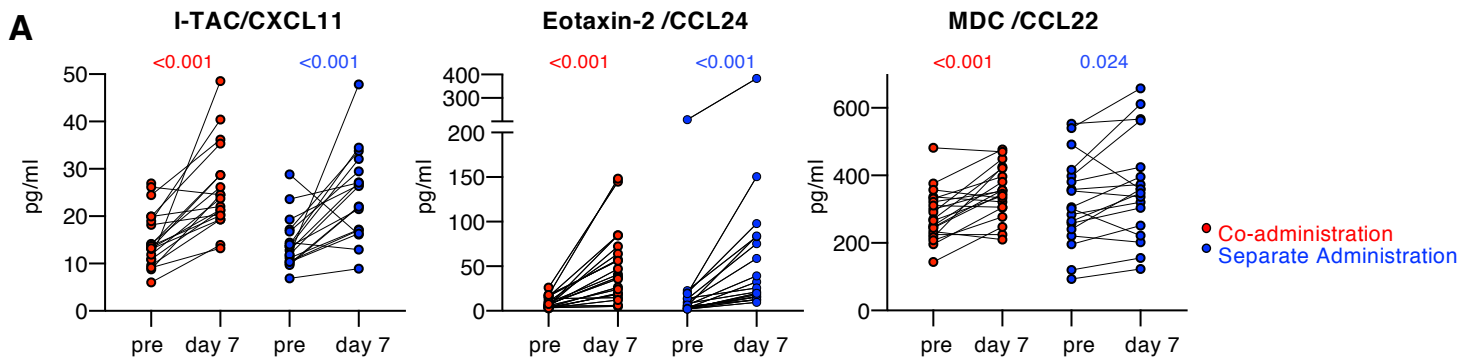

**B**

| Analyte              | Co-administration (N=20)<br>(pg/ml plasma) |                   |                                | Separate site administration (N=18)<br>(pg/ml plasma) |                   |                                | Difference between vaccine groups |                          |
|----------------------|--------------------------------------------|-------------------|--------------------------------|-------------------------------------------------------|-------------------|--------------------------------|-----------------------------------|--------------------------|
|                      | pre<br>(median)                            | day 7<br>(median) | Wilcoxon<br>T test,<br>p value | pre<br>(median)                                       | day 7<br>(median) | Wilcoxon<br>T test,<br>p value | pre t test,<br>p value            | day 7 t test,<br>p value |
| I-TAC /CXCL11        | 13.5                                       | 22.9              | <math><0.001</math>            | 13.2                                                  | 24.2              | <math><0.001</math>            | NS                                | NS                       |
| IP-10 /CXCL10        | 327.7                                      | 423.5             | <b>0.009</b>                   | 324.1                                                 | 370.2             | <b>0.014</b>                   | NS                                | NS                       |
| IL-1Ra               | 45.5                                       | 89.9              | <b>0.005</b>                   | 48.6                                                  | 70.9              | <b>0.03</b>                    | NS                                | NS                       |
| Eotaxin /CCL11       | 184.9                                      | 249.7             | <b>0.027</b>                   | 192.5                                                 | 229.5             | <b>0.081</b>                   | NS                                | NS                       |
| Eotaxin-2 /CCL24     | 6.7                                        | 39.2              | <math><0.001</math>            | 6.0                                                   | 29.2              | <math><0.001</math>            | NS                                | NS                       |
| FLT3L                | 11.0                                       | 17.9              | <math><0.001</math>            | 11.3                                                  | 13.81             | <math><0.001</math>            | NS                                | NS                       |
| MIP-1 $\alpha$ /CCL3 | 11.9                                       | 14.5              | <b>0.022</b>                   | 10.3                                                  | 14.0              | <b>0.009</b>                   | NS                                | NS                       |
| MIP-1 $\beta$ /CCL4  | 71.1                                       | 78.6              | <b>0.033</b>                   | 72.8                                                  | 93.4              | <b>0.005</b>                   | NS                                | NS                       |
| MDC /CCL22           | 268.4                                      | 349.3             | <math><0.001</math>            | 304.2                                                 | 353.1             | <b>0.024</b>                   | NS                                | NS                       |

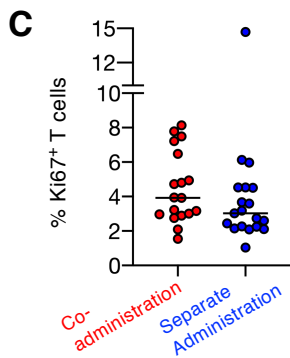

**Figure S6, Related to Figures 1-3. Measurements of Factors Associated with Immune Activation.**

(A, B) Plasma concentration of chemokines associated with immune activation. Comparison of pre-vaccination samples (pre) and plasma samples collected at day 7 after the 1<sup>st</sup> vaccination shows significant increases in the chemokines shown, using the NHP Meso Scale Discovery multiplex assay. (A) Change in I-TAC/CXCL11 levels. (B) Summary of comparison of median levels of these analytes at pre-vaccination and day 7 and p values (Wilcoxon T test). Mann-Whitney tests did not show differences between the groups. (C) Comparison of Ki67 levels in total T cells from PBMC collected 2 weeks after the 6<sup>th</sup> vaccination shows similar low levels of T cell proliferation.

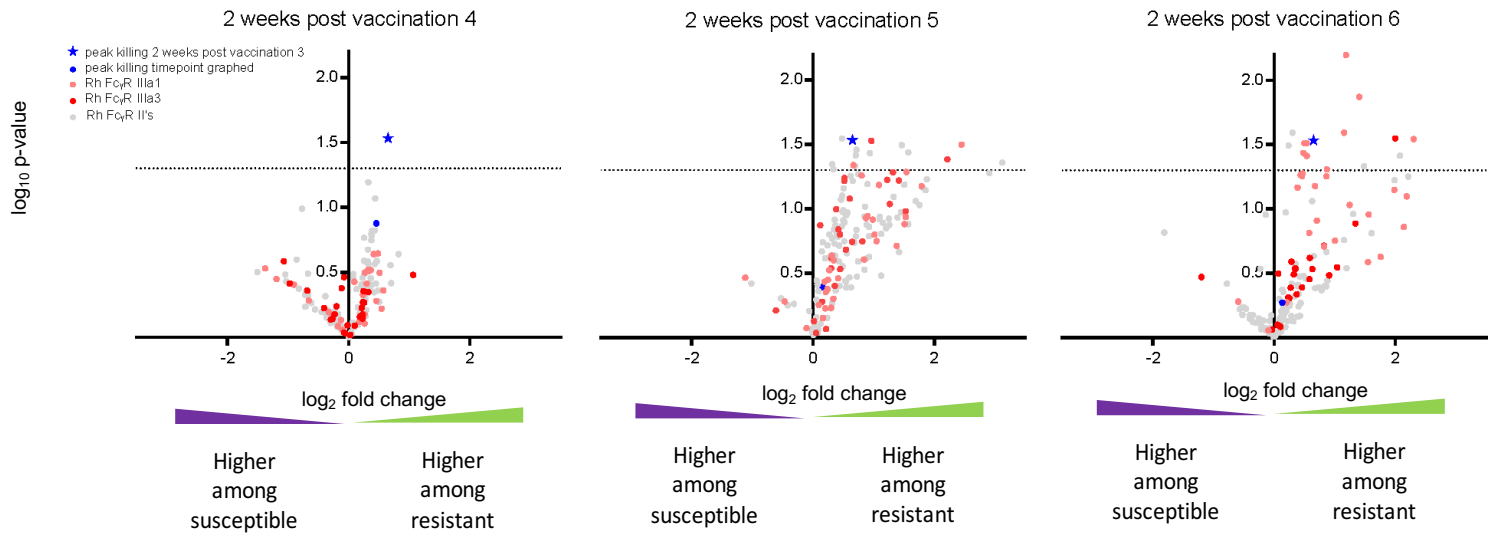

**Figure S7, Related to Figure 6: Variation between Resistant and Susceptible Animals among Select Features Over Time.**

Volcano plots for ADCC and antigen-specific antibody interactions with Fc $\gamma$ RII, and Fc $\gamma$ RIII between resistant and susceptible animals at 2 weeks post 4<sup>th</sup>, 5<sup>th</sup> and 6<sup>th</sup> vaccination, depicting  $\log_2$  fold change in medians between groups and unadjusted  $\log_{10}$  p values. Contemporaneous peak ADCC and that observed at post 3<sup>rd</sup> vaccination are indicated with blue dots and stars, respectively. Each red and grey dot represents Fc receptor binding for a different individual antigen specificity for a given Fc $\gamma$ R allotype.



**Table S1, Related to Figure 1: Description of 60 Female Macaques Enrolled in the Vaccine Study**

| vaccination                                 | Animal ID | Age at study start (yr) <sup>1</sup> | selected MHC class I haplotypes <sup>2</sup> |      |      | necropsy during study | SHIV CH505 acquisition |
|---------------------------------------------|-----------|--------------------------------------|----------------------------------------------|------|------|-----------------------|------------------------|
|                                             |           |                                      | A*01                                         | B*08 | B*17 |                       |                        |
| Co-administration (N=20) <sup>3</sup>       | EE32      | 13                                   | P                                            | N    | N    |                       | >15                    |
|                                             | EI94      | 12                                   | N                                            | N    | N    |                       | >15                    |
|                                             | FG06      | 11                                   | N                                            | N    | N    | yes <sup>4</sup>      | N/A                    |
|                                             | GB06      | 10                                   | N                                            | N    | N    |                       | 13                     |
|                                             | GH90      | 9                                    | N                                            | N    | N    |                       | >15                    |
|                                             | GI26      | 9                                    | P                                            | N    | N    |                       | 3                      |
|                                             | GI29      | 9                                    | N                                            | N    | N    |                       | >15                    |
|                                             | GI36      | 9                                    | N                                            | N    | N    |                       | >15                    |
|                                             | GI46      | 9                                    | N                                            | N    | N    |                       | >15                    |
|                                             | GM16      | 9                                    | N                                            | N    | N    |                       | 2                      |
|                                             | GM22      | 9                                    | N                                            | N    | P    |                       | >15                    |
|                                             | GM40      | 9                                    | N                                            | N    | N    |                       | 5                      |
|                                             | HF57      | 8                                    | N                                            | N    | N    |                       | >15                    |
|                                             | HP40      | 7                                    | N                                            | N    | N    |                       | 15                     |
|                                             | IA21      | 7                                    | N                                            | N    | N    |                       | 2                      |
|                                             | IA36      | 7                                    | N                                            | N    | N    |                       | 2                      |
|                                             | IN66      | 6                                    | N                                            | N    | N    |                       | >15                    |
|                                             | JC25      | 5                                    | N                                            | N    | N    |                       | 4                      |
|                                             | JE14      | 5                                    | P                                            | N    | N    | yes <sup>4</sup>      | N/A                    |
|                                             | JE99      | 5                                    | N                                            | N    | N    |                       | 4                      |
| Separate Administration (N=20) <sup>5</sup> | EE71      | 13                                   | P                                            | N    | N    |                       | 4                      |
|                                             | FE35      | 11                                   | N                                            | N    | N    | yes <sup>6</sup>      | N/A                    |
|                                             | GC03      | 10                                   | N                                            | N    | N    |                       | 5                      |
|                                             | GH35      | 9                                    | N                                            | N    | N    |                       | 15                     |
|                                             | GH91      | 9                                    | P                                            | N    | N    | yes <sup>4</sup>      | N/A                    |
|                                             | GJ04      | 9                                    | N                                            | N    | N    |                       | 3                      |
|                                             | GK91      | 9                                    | N                                            | N    | N    |                       | 2                      |
|                                             | GM41      | 9                                    | N                                            | N    | N    |                       | 5                      |
|                                             | GM52      | 9                                    | N                                            | N    | N    | yes <sup>4</sup>      | N/A                    |
|                                             | GM62      | 9                                    | P                                            | N    | N    |                       | 6                      |
|                                             | GN03      | 9                                    | N                                            | N    | N    |                       | 4                      |
|                                             | HE88      | 8                                    | N                                            | N    | N    |                       | 4                      |
|                                             | HV65      | 7                                    | N                                            | N    | P    |                       | 2                      |
|                                             | IC95      | 7                                    | N                                            | N    | N    |                       | 9                      |
|                                             | IJ26      | 6                                    | N                                            | N    | N    |                       | >15                    |
|                                             | IV92      | 5                                    | P                                            | N    | N    |                       | >15                    |
|                                             | JB44      | 5                                    | N                                            | N    | N    |                       | 5                      |
|                                             | JC12      | 5                                    | N                                            | N    | N    |                       | 3                      |
|                                             | JC52      | 5                                    | N                                            | N    | N    |                       | 3                      |
|                                             | JF94      | 5                                    | N                                            | N    | N    |                       | 15                     |
| sham control (N=10)                         | EI21      | 12                                   | N                                            | N    | N    | yes <sup>7</sup>      | 14                     |
|                                             | GI05      | 9                                    | N                                            | N    | N    |                       | 1                      |
|                                             | GI23      | 9                                    | N                                            | N    | N    |                       | 9                      |
|                                             | GL37      | 9                                    | P                                            | N    | N    |                       | 5                      |
|                                             | GN85      | 9                                    | N                                            | N    | N    |                       | 5                      |
|                                             | GP69      | 9                                    | N                                            | N    | N    |                       | 9                      |
|                                             | JB16      | 5                                    | P                                            | N    | N    |                       | 3                      |
|                                             | JC13      | 5                                    | N                                            | N    | N    |                       | 1                      |
|                                             | JD01      | 5                                    | N                                            | N    | N    |                       | 4                      |
|                                             | JH79      | 5                                    | N                                            | N    | N    |                       | 4                      |
| treatment-naïve control (N=10)              | FE61      | 11                                   | N                                            | N    | N    |                       | 13                     |
|                                             | GH46      | 9                                    | P                                            | N    | N    |                       | 3                      |
|                                             | GN98      | 9                                    | N                                            | N    | N    |                       | 2                      |
|                                             | GR55      | 9                                    | N                                            | N    | N    |                       | 8                      |
|                                             | HF50      | 8                                    | N                                            | N    | N    |                       | 1                      |
|                                             | JD40      | 5                                    | N                                            | N    | N    |                       | 4                      |
|                                             | JF42      | 5                                    | N                                            | N    | N    |                       | 5                      |
|                                             | JG62      | 5                                    | N                                            | N    | N    |                       | >15                    |
|                                             | JG64      | 5                                    | N                                            | N    | N    |                       | 2                      |
|                                             | JH19      | 5                                    | N                                            | N    | P    |                       | >15                    |

<sup>1</sup>age range 5-13 years; median 9 years

<sup>2</sup>per group: 3-4 mamuA\*01; no mamuB\*08; 1 mamuB\*17

<sup>3</sup>challenge study was performed with 18 animals

<sup>4</sup>elect necropsy at 2 weeks post 6th vaccination

<sup>5</sup>challenge study was performed with 17 animals

<sup>6</sup>health-related necropsy after the 2<sup>nd</sup> vaccination

<sup>7</sup>sacrificed 9 weeks post-infection due to development of AIDS-related disease including weight loss, low albumin levels, opportunistic viral infection, and secondary amyloidosis

**Table S2, Related to Figures 2-6: Listing of Env-specific Humoral Immune Response Assays**

| ASSAY                               |                                                                      | Time points analyzed during the study (2 weeks post vaccination) |   |   |   |   |
|-------------------------------------|----------------------------------------------------------------------|------------------------------------------------------------------|---|---|---|---|
|                                     |                                                                      | 2                                                                | 3 | 4 | 5 | 6 |
| Ab, plasma                          | Env                                                                  | X                                                                | x | x | x | x |
|                                     | Env on cell-surface ICABA                                            |                                                                  |   | x | x | x |
|                                     | V1V2                                                                 |                                                                  |   |   |   | x |
|                                     | cV2                                                                  | X                                                                | x | x | x | x |
|                                     | linear peptide                                                       |                                                                  |   |   | x |   |
|                                     | CD4 binding site blocking assay                                      | X                                                                | x | x | x |   |
|                                     | Avidity                                                              |                                                                  |   |   | x | x |
| Ab, mucosal                         | Env, V1V2                                                            |                                                                  |   |   |   | x |
| NAb                                 | Env                                                                  |                                                                  | x | x | x | x |
| Ab, function targeting CH505 gp120: | ADCC (antibody-dependent cellular cytotoxicity)                      |                                                                  | x | x | x | x |
|                                     | ADCD (antibody-dependent complement deposition)                      |                                                                  |   |   |   | x |
|                                     | ADCP (antibody-dependent cellular phagocytosis)                      |                                                                  |   |   |   | x |
|                                     | ADNP (antibody-dependent neutrophil phagocytosis)                    |                                                                  |   |   |   | x |
|                                     | ADNKA (antibody dependent NK activation)                             |                                                                  |   |   |   | x |
| Ab, IgG glycan structures           | galactosylated, sialylated, fucosylated, bisecting                   |                                                                  |   |   |   | x |
| Ab, Fc Array detection: Ab subclass | aRh IgG, aRh IgG1, aRh IgG2, aRh IgG3                                |                                                                  |   | x | x | x |
| Ab isotype                          | aHu IgA                                                              |                                                                  |   | x | x | x |
| Rh Fc receptors                     | FcγRIIa1, FcγRIIa2, FcγRIIa3, FcγIIb1, FcγRIIIa1, FcγRIIIa3, Hu FcRn |                                                                  |   | x | x | x |
| complement                          | C1q                                                                  |                                                                  |   | x | x | x |

**Table S3, Related to Figures 2-6: Listing of Assays and Targets**

| ASSAYS              | TARGETS                             | clade | ASSAYS                | TARGETS                            | clade | ASSAYS                           | TARGETS                      | clade |
|---------------------|-------------------------------------|-------|-----------------------|------------------------------------|-------|----------------------------------|------------------------------|-------|
| <b>binding Ab</b>   | CH505.TF.gp120                      | C     | <b>linear peptide</b> | A.con                              | A     | <b>Nab</b>                       | CH505.TF                     | C     |
|                     | CH0505.TF                           | C     |                       | AE.con                             | AE    |                                  | CH505.w4.3                   | C     |
|                     | CH0505.TF.d371                      | C     |                       | AG.con                             | AG    |                                  | CH505.w53.e16                | C     |
|                     | CH505TF_D7gp120                     | C     |                       | B.con                              | B     |                                  | CH505.w78.33                 | C     |
|                     | CH505.M5.D8                         | C     |                       | C.con                              | C     |                                  | CH505.w100.B6                | C     |
|                     | CH0505.M11.D8                       | C     |                       | D.con                              | D     |                                  | SHIV CH505.375Y              | C     |
|                     | CH505.w020.14D8                     | C     |                       | M.con                              | M     |                                  | CH505.gly4/293T              | C     |
|                     | CH505.w030.12D8                     | C     |                       | B.MN                               | B     |                                  | CH505.gly3.276/293T          | C     |
|                     | CH505.w030.20.D8                    | C     |                       | AE.A244                            | AE    |                                  | CH505.G458Y.4/GnTI-          | C     |
|                     | CH505.w136.18D8                     | C     |                       | AE.92TH023                         | AE    |                                  | 426c.DM/GnTI-                | C     |
|                     | RSC3                                | B     |                       | C.1086                             | C     |                                  | 426c.TM/GnTI-                | C     |
|                     | RSC3.d371                           | B     |                       | C.TV1                              | C     |                                  | SHIV SF162P3                 | B     |
|                     | YU2                                 | B     |                       | C.ZM651                            | C     | <b>bAb in vaginal secretion:</b> |                              |       |
|                     | YU2 D368R                           | B     |                       | CH505TF.gp160                      | C     | <b>gp120</b>                     | CH505.M11D8gp120/293F/Mon    | C     |
|                     | HxBc2 Core Ds109/428/GnTI-          | B     |                       | CH505TFD8gp120                     | C     |                                  | CH505.M5D8gp120/293F/Mon     | C     |
|                     | CH0505_CON D7 gp120                 | C     |                       | CH505.M5.gp160                     | C     |                                  | CH505.w30.12D8gp120/293F/Mon | C     |
|                     | CH505w100 B6 6R SOSIP               | C     |                       | CH505.M5D8gp120                    | C     |                                  | CH505w020.14D8gp120/293F Mon | C     |
|                     | BG505 gp140 SOSIP T332N             | A     |                       | CH505.M6.gp160                     | C     |                                  | CH505w030.20D8gp120/293F/Mon | C     |
|                     | Con.6.gp120.B                       | B     |                       | CH505.M11.gp160                    | C     |                                  | CH505w136.B18D8gp120/Mon     | C     |
|                     | Con.S.gp140.CFI                     | M     |                       | CH505.M11D8gp120                   | C     |                                  | HxB2 new 8b core 6x His      | B     |
|                     | p27gag                              | NA    |                       | CH505w020.14.gp160                 | C     |                                  | HxB2 new 8b core 1420R       | B     |
| <b>competition</b>  | CH106xCH0505TF_D7 gp120.avi/293F    | C     |                       | CH505w020.14D8gp120                | C     |                                  | YU2 gp120 old core           | B     |
|                     | CH106xCH0505TF_D7 gp120.avi/293F    | C     |                       | CH505w0.30.12.gp160                | C     |                                  | YU2 gp120 old core D368R     | B     |
|                     | CH235xCH0505TF_D7 gp120.avi/293F    | C     |                       | CH505.w30.12D8gp120                | C     |                                  | CH505TF_D7gp120.avi/293F     | C     |
|                     | sCD4xCH0505TF_D7 gp120.avi/293F     | C     |                       | CH505w0.30.20.gp160                | C     |                                  | CH505 TF delta371Ile gp120   | C     |
|                     | sCD4x8.63521_gp120delta11/293F      | B     |                       | CH505w030.20D8gp120                | C     | <b>gp140</b>                     | C.con_env03gp140CF_avi       | C     |
|                     | 2G12 x M.CON-S gp140CFI/trimer      | M     |                       | CH505w030.21.gp160                 | C     |                                  | Con S gp140 CFI              | C     |
| <b>Avidty</b>       | 1086C_gp120                         | C     |                       | CH505w30.25gp145                   | C     | <b>gp70-V1V2</b>                 | gp70_B.CaseA_V1_V2           | A     |
|                     | 1086 gp140C                         | C     |                       | CH505w030.25D8gp120                | C     |                                  | gp70-BF1266_431a_V1V2        | C     |
|                     | B63521_gp120delta11                 | B     |                       | CH505w030.28.gp160                 | C     |                                  | gp70-Ce1086_B2 V1V2          | C     |
|                     | CH505_TF D7gp120                    | C     |                       | CH505w053.16.gp160                 | C     |                                  | gp70-191084_B7 V1V2          | A     |
|                     | CH505w53.e16.D8gp120                | C     |                       | CH505w053.16D8gp120                | C     |                                  | gp70-TV1.21.V1V2             | C     |
|                     | CH505 M5D8gp120                     | C     |                       | CH505w53.25gp145                   | C     |                                  | gp70-1394C9G1 V1V2           | C     |
|                     | CH505TFchim.6R.SOSIP.664_avi-Bio    | C     |                       | CH505w053.25D8gp120                | C     |                                  | gp70-620345.c01 V1V2         | AE    |
|                     | CH505TF.6R.SOSIP.664.v4.1_avi.2_Bio | C     |                       | CH505w53.29gp145                   | C     |                                  | gp70-CNE5_V1V2               | AE    |
| <b>gp70 V1V2</b>    | gp70.191084_B7.V1V2                 | A     |                       | CH505w053.29D8gp120                | C     | <b>gp70-V3</b>                   | B.MN V3 gp70                 | B     |
|                     | gp70.C2101.c01_V1V2                 | AE    |                       | CH505w053.31.gp160                 | C     | <b>Fc Array assay:</b>           |                              |       |
|                     | gp70.CM244.ec1.V1V2                 | AE    |                       | CH505w078.15.gp160                 | C     | <b>gp140</b>                     | 90045 gp140C.avi*            | A     |
|                     | gp70.GNE5                           | AE    |                       | CH505w078.33.gp160                 | C     |                                  | C3347_11 gp140C.avi          | AE    |
|                     | gp70.62357.14.V1V2                  | B     |                       | CH505w078.33D8gp120                | C     |                                  | CNE5 gp140C.avi/293F         | AE    |
|                     | gp70.700010058.V1V2                 | B     |                       | CH505w100.B6.gp160                 | C     |                                  | QH0515.gp140C.avi            | B     |
|                     | gp70_B.CaseA_V1_V2                  | B     |                       | CH505w100.B6D8gp120                | C     |                                  | B.6240 gp140C/293F           | B     |
|                     | gp70.RHPA4259.7.V1V2                | B     |                       | CH505w0.136.B18.gp160              | C     |                                  | gp140 SHIV SF162P3           | B     |
|                     | gp70.TT31P.2F10.2792.V1V2           | B     |                       | CH505w136.B18D8gp120               | C     | <b>gp120</b>                     | Q769_D11 gp120.avi/293F      | A     |
|                     | gp70.BJOX002000.03.2.V1V2           | BC    |                       | CH505TFchim.6R.SOSIP.664           | C     |                                  | X620345_D11 gp120.avi/293F   | AE    |
|                     | gp70.001428.2.42.V1V2               | C     |                       | CH505TFchim.DS.6R.SOSIP.664        | C     |                                  | BJOX028_D11 gp120.avi/293F   | AE    |
|                     | gp70.7060101641.V1V2                | C     |                       | CH505TFchim.6R.SOSIP.664v4.1       | C     |                                  | B.6240 D11 gp120.avi/293F*   | B     |
|                     | gp70.962M651.02.V1V2                | C     |                       | CH505TFchim.6R.SOSIP.664v4.2       | C     |                                  | FLSC (CD4i)                  | B     |
|                     | gp70.BF1266_431a_V1V2               | C     |                       | CH505M5chim.6R.SOSIP.664v4.1       | C     |                                  | gp120 JRCSF                  | B     |
|                     | gp70.CAP210.2.00.E8.V1V2            | C     |                       | CH505M5chim.6R.SOSIP.664v4.2       | C     |                                  | gp120 SHIV SF162P3           | B     |
|                     | gp70.Ce1086_B2.V1V2                 | C     |                       | CH505M11chim.6R.SOSIP.664v4.1      | C     |                                  | C.089_D11 gp120/293F         | C     |
|                     | gp70.TV1.21.V1V2                    | C     |                       | CH505M11chim.6R.SOSIP.664v4.2      | C     |                                  | CH0505_TF gp120/293F         | C     |
|                     | gp70.1394C9G1.V1V2                  | C     |                       | CH505w20.14chim.6R.SOSIP.664v4.1   | C     |                                  | CH0505_TF D7gp120/293F/Mon   | C     |
|                     | gp70.CAP45.2.00.G3.V1V2             | C     |                       | CH505w20.14chim.6R.SOSIP.664v4.2   | C     |                                  | CH505.M11 D8 gp120/293F      | C     |
|                     | gp70.Ce1176.V1V2                    | C     |                       | CH505w30.12chim.6R.SOSIP.664v4.1   | C     |                                  | CH505.M5D8gp120/293F         | C     |
|                     | gp70.Ce704010042_2ES.V1V2           | C     |                       | CH505w30.12chim.6R.SOSIP.664v4.2   | C     |                                  | CH505.w30.12D8gp120/293F     | C     |
|                     | gp70.ConC.V1V2                      | C     |                       | CH505w30.20.chim.6R.SOSIP.664v4.1  | C     |                                  | CH505w020.14D8 gp120 293F    | C     |
|                     | gp70.Du156.12.V1V2                  | C     |                       | CH505w30.20chim.6R.SOSIP.664v4.2   | C     |                                  | CH505w030.20D8gp120/293F     | C     |
| <b>tags</b>         | AE.A244.V1V2.Tags.293F              | AE    |                       | CH505w53.16chim.6R.SOSIP.664       | C     |                                  | CH505w136.B18D8gp120/293F    | C     |
|                     | AE.A244.V2.tags.293F                | AE    |                       | CH505w53.16chim.DS.6R.SOSIP.664    | C     |                                  | STG-WT                       | B     |
|                     | C.1086.V2.tags.293F                 | C     |                       | CH505w053.16.chim.6R.SOSIP.664v4.1 | C     |                                  | STG/KLE                      | B     |
|                     | C.1086C_V1_V2.Tags                  | C     |                       | CH505w053.16.chim.6R.SOSIP.664v4.2 | C     | <b>gp70</b>                      | REJO4541.67 gp70-V1V2        | B     |
| <b>cyclic V2</b>    | CH505                               | C     |                       | CH505w078.33.chim.6R.SOSIP.664v4.1 | C     |                                  | CaseA2 gp70 V1V2*            | A     |
|                     | 1086C                               | C     |                       | CH505w078.33.chim.6R.SOSIP.664v4.2 | C     |                                  | 62357_14 gp70-V1V2*          | B     |
|                     | 92TH23                              | AE    |                       | CH505w78.33.6R.SOSIP.664           | C     |                                  | 7060101641A7 gp70-V1V2*      | C     |
|                     | MN                                  | B     |                       | CH505w78.33.DS.6R.SOSIP.664        | C     |                                  | Ce1086_B2 gp70-V1V2*         | C     |
| <b>ICABA</b>        | CH505                               | C     |                       | CH505w100.B6.6R.SOSIP.664          | C     |                                  | Ce704010042_2ES gp70-V1V2    | C     |
| <b>Ab function:</b> |                                     |       |                       | CH505w100.B6.DS.6R.SOSIP.664       | C     |                                  | gp70 Scaffold (control) WT   |       |
| ADNKA               | CH505 M5 gp120                      | C     |                       | CH505w100.B6chim.6R.SOSIP.664v4.1  | C     | <b>other</b>                     | gp41 HxBc2                   | B     |
| ADCC                | CH505 M5 gp120                      | C     |                       | CH505w100.B6chim.6R.SOSIP.664v4.2  | C     |                                  | RSC                          | B     |
| ADCD                | CH505 M5 gp120                      | C     |                       | CH505w136.B6chim.6R.SOSIP.664v4.1  | C     |                                  | V3                           |       |
| ADCP                | CH505 M5 gp120                      | C     |                       | CH505w136.B6chim.6R.SOSIP.664v4.2  | C     |                                  | Gag SIV mac239               |       |
| ADNP                | CH505 M5 gp120                      | C     |                       |                                    |       |                                  | IIIB p55 Gag; p24gag HxBc2   | B     |

**Table S4, Related to Figure 3: Neutralization Assays in TZM-bl Cells using Pseudotyped Viruses**

| post vaccination        | vaccination group       | Number of animals tested | Animal with sporadic response | ID50 in TZM-bl cells <sup>1</sup> |                             |                            |                             |                  |                |                                |                                    |                            |                            |                                   |                                    |
|-------------------------|-------------------------|--------------------------|-------------------------------|-----------------------------------|-----------------------------|----------------------------|-----------------------------|------------------|----------------|--------------------------------|------------------------------------|----------------------------|----------------------------|-----------------------------------|------------------------------------|
|                         |                         |                          |                               | CH0505s (TF)                      | CH0505.w53.e16 <sup>2</sup> | CH0505.w78.33 <sup>2</sup> | CH0505.w100.B6 <sup>2</sup> | SHIV CH0505.375Y | SHIV SF162P3   | CH0505.gly4 /293T <sup>3</sup> | CH0505.gly3.276 /293T <sup>3</sup> | 426c.DM /GnTI <sup>4</sup> | 426c.TM /GnTI <sup>4</sup> | CH0505.G458Y.4 /GnTI <sup>5</sup> | CH0505.gly3.276 /GnTI <sup>6</sup> |
|                         |                         |                          |                               | Clade C TF                        | Clade C Tier 2              | Clade C Tier 2             | Clade C Tier 2              | Clade C Tier 2   | Clade B Tier 2 | Clade C Tier 1A                | Clade C Tier 1A                    | Clade C Tier 2             | Clade C Tier 2             | Clade C Tier 1A                   | Clade C Tier 1A                    |
| 3                       | Co-administration       | 20                       |                               | <20                               | <20                         | <20                        | <20                         | <20              | ND             | ND                             | ND                                 | ND                         | ND                         | ND                                | ND                                 |
|                         | Separate Administration | 19                       |                               | <20                               | <20                         | <20                        | <20                         | <20              | ND             | ND                             | ND                                 | ND                         | ND                         | ND                                | ND                                 |
| 4                       | Co-administration       | 20                       |                               | <20                               | <20                         | <20                        | <20                         | <20              | ND             | ND                             | ND                                 | ND                         | ND                         | ND                                | ND                                 |
|                         | Separate Administration | 19                       |                               | <20                               | <20                         | <20                        | <20                         | <20              | ND             | ND                             | ND                                 | ND                         | ND                         | ND                                | ND                                 |
| 5                       | Co-administration       | 20                       |                               | <20                               | <20                         | <20                        | <20                         | <20              | <20            | <20                            | <20                                | <20                        | <20                        | <20                               | ND                                 |
|                         |                         |                          | GB06                          | <20                               | <20                         | <20                        | 24                          | <20              | <20            | <20                            | <20                                | <20                        | <20                        | <20                               | ND                                 |
|                         |                         |                          | JE99                          | <20                               | <20                         | <20                        | 23                          | <20              | <20            | 21                             | <20                                | <20                        | <20                        | <20                               | ND                                 |
|                         | Separate Administration | 19                       |                               | <20                               | <20                         | <20                        | <20                         | <20              | <20            | <20                            | <20                                | <20                        | <20                        | <20                               | ND                                 |
| 6                       |                         |                          | HE88                          | <20                               | <20                         | <20                        | 36                          | <20              | <20            | <20                            | <20                                | <20                        | <20                        | <20                               | ND                                 |
|                         | Co-administration       | 20                       |                               | <20                               | ND                          | ND                         | ND                          | ND               | ND             | <20                            | <20                                | <20                        | <20                        | <20                               | <20                                |
|                         |                         |                          | FG06                          | <20                               | ND                          | ND                         | ND                          | ND               | ND             | <20                            | <20                                | <20                        | <20                        | <20                               | 20                                 |
| Separate Administration | 19                      |                          | <20                           | ND                                | ND                          | ND                         | ND                          | ND               | <20            | <20                            | <20                                | <20                        | <20                        | <20                               |                                    |

<sup>1</sup>Values are the serum dilution at which relative luminescence units (RLUs) were reduced 50% compared to virus control wells (no test sample)

<sup>2</sup>CH505 lineage Env CH505.w53.e16, CH505.w78.e33, CH505.w100.B6 are sensitive to CH103 lineage bNAb precursors

<sup>3</sup>CH505.gly3.276 and CH505.gly4 are sensitive to CH103 and DH235 lineage bNAb precursors

<sup>4</sup>426c.DM and 426c.TM (Man5-enriched) are sensitive to VRC01-like CD4bs bNABs and precursors

<sup>5</sup>CH0505.G458Y/GnTI-, a mutant of CH0505 that is neutralized by the DH235 fully reverted germline antibody, is sensitive to DH235 lineage antibodies

<sup>5</sup>CH0505.gly3.276 glycan mutant grown in 293S/GnTI- cells is sensitive to V2-glycan bNABs and CD4bs bNABs

**Table S5, Related to Figure 4: Cross-timepoint Model Accuracy for Classification of Vaccine Groups and Challenge.**

| Input Data <sup>1</sup>                              |                                        |          |                 |             |                 |             |             |                           |                                                      |
|------------------------------------------------------|----------------------------------------|----------|-----------------|-------------|-----------------|-------------|-------------|---------------------------|------------------------------------------------------|
| Vaccine Group Classification                         |                                        |          |                 |             |                 |             |             |                           |                                                      |
| Model                                                | Timepoint<br>2 wks post<br>vaccination | baseline | vaccination     | vaccination | Vaccination     | vaccination | vaccination | vaccination               | avg 1 <sup>st</sup> – 6 <sup>th</sup><br>vaccination |
|                                                      |                                        |          | 1               | 2           | 3               | 4           | 5           | 6                         |                                                      |
|                                                      | 1                                      | 74       | 80 <sup>2</sup> | 51          | 63              | 41          | 46          | - <sup>3</sup>            | 56                                                   |
|                                                      | 2                                      | 43       | 51              | 89          | 82              | 69          | 79          | -                         | 74                                                   |
|                                                      | 3                                      | 54       | 57              | 89          | 97              | 66          | 66          | 42                        | 75                                                   |
|                                                      | 4                                      | 46       | -               | -           | -               | 74          | 72          | -                         | 73                                                   |
|                                                      | 5                                      | 40       | 54              | 74          | 57              | 74          | 91          | -                         | 70                                                   |
|                                                      | 6                                      | 41       | -               | -           | -               | 51          | 64          | 73                        | 58                                                   |
|                                                      |                                        |          |                 |             |                 |             |             |                           | 68                                                   |
| Challenge Outcome Classification – Co-Administration |                                        |          |                 |             |                 |             |             |                           |                                                      |
|                                                      |                                        | baseline | vaccination     | vaccination | vaccination     | vaccination | vaccination | vaccination               | avg 1 <sup>st</sup> – 6 <sup>th</sup><br>vaccination |
|                                                      | 3                                      | -        | -               | -           | 78 <sup>2</sup> | 61          | 67          | 53                        | 65                                                   |
| Randomly selected features <sup>4</sup>              |                                        |          |                 |             |                 |             |             |                           |                                                      |
|                                                      |                                        |          |                 |             |                 |             |             | Average across all models | 49                                                   |

<sup>1</sup>Model generalizability was assessed by defining the accuracy of classification when simplified final models for a given timepoint were applied to classify subjects based on data from other timepoints. For each timepoint, a simplified final model relying on the top two features and their coefficients from the global final model was used to predict class using data available at other timepoints.

<sup>2</sup>Performance of contemporaneous data using the simplified, two-feature models is on the diagonal, indicated in outlined boxes.

<sup>3</sup>Dashes indicate timepoints at which data for the relevant features were not available.

<sup>4</sup>In contrast, models learned from pairs of features selected at random yielded a mean classification accuracy of 49% across 100 repeats.
